# Supplementary material for: Quantification of occupational and community risk factors for SARS-CoV-2 seropositivity among healthcare workers in a large U.S. healthcare system
Source: bioRxiv or medRxiv preprint supplement (doi:10.1101/2020.10.30.20222877), 2020-11-03
Supplement: Supplementary file [file media-1.pdf]

Quantification of occupational and community risk factors for SARS-CoV-2 seropositivity among healthcare workers in a large U.S. healthcare system

## Authors

Julia M. Baker\*, PhD,<sup>1</sup> Kristin N. Nelson\*, PhD,<sup>1</sup> Elizabeth Overton, MSPH,<sup>2</sup> Benjamin A. Lopman, PhD,<sup>1</sup> Timothy L. Lash, DSc,<sup>1</sup> Mark Photakis, BBA,<sup>2</sup> Jesse T. Jacob, MD,<sup>3</sup> John Roback, MD PhD,<sup>3</sup> Scott K. Fridkin, MD,<sup>3</sup> James P. Steinberg, MD<sup>3</sup>

\* These authors contributed equally to this work.

## Affiliations

<sup>1</sup> Rollins School of Public Health, Emory University, Georgia, USA

<sup>2</sup> Emory Healthcare, Georgia, USA

<sup>3</sup> Emory University School of Medicine, Emory University, Georgia, USA

## Supplement

**eFigure 1.** Number of study participants (A) and cumulative incidence of COVID-19 (B) by zip code <sup>a</sup>

**eTable 1.** Details of data sources and factor descriptions

**eTable 2.** Additional descriptive statistics for survey participants. (n=9,610)

**eTable 3.** STROBE statement- checklist of items that should be included in reports of observational studies

**eFigure 1. Number of study participants (A) and cumulative incidence of COVID-19 (B) by zip code <sup>a</sup>**

**A**

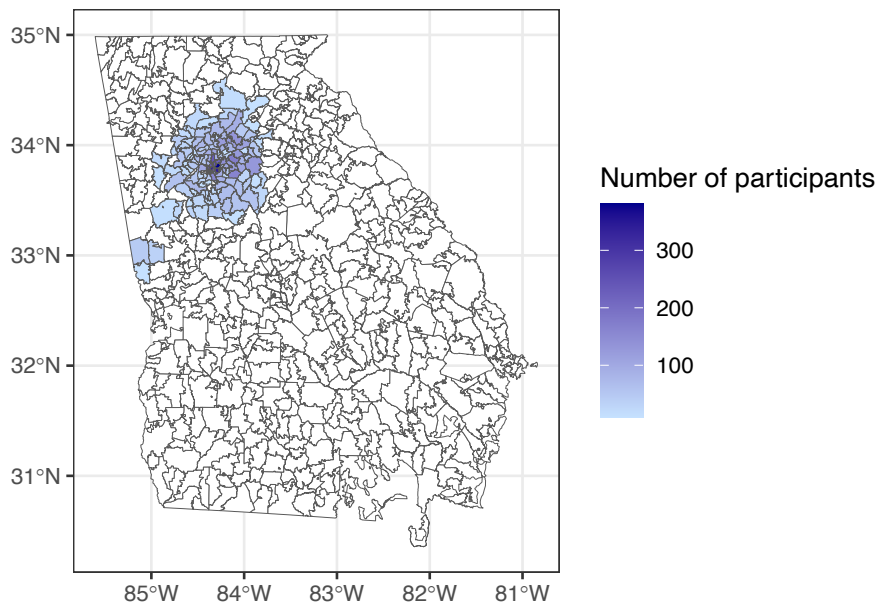

**B**

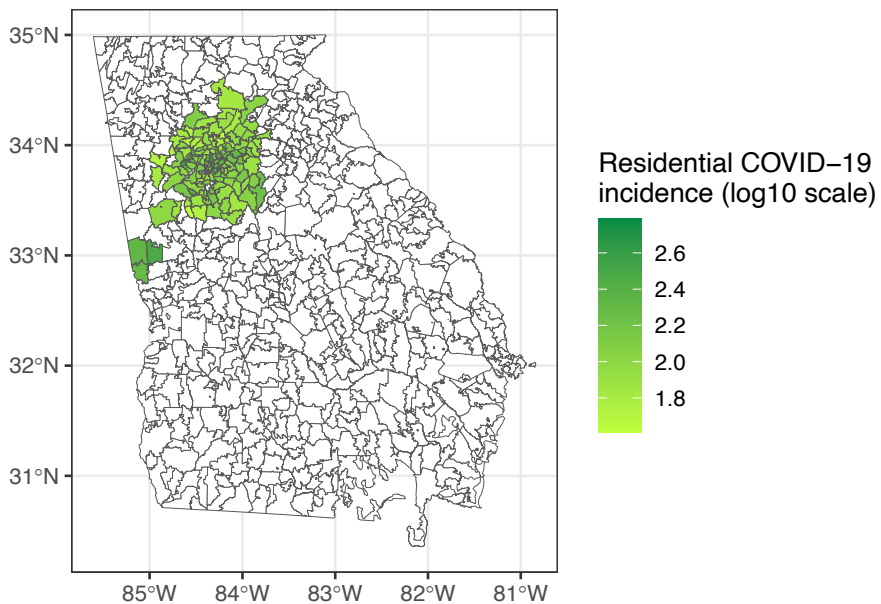

<sup>a</sup> Data for zip codes with fewer than 10 study participants are excluded from the figure.

**eTable 1. Details of data sources and factor descriptions.**

| <b>Factor</b>                                           | <b>Data source</b>                                                                | <b>Survey question</b>                                                                                                                                          | <b>Possible responses</b>                                                    | <b>Additional information</b>                                                                                                                                                                                                                  |
|---------------------------------------------------------|-----------------------------------------------------------------------------------|-----------------------------------------------------------------------------------------------------------------------------------------------------------------|------------------------------------------------------------------------------|------------------------------------------------------------------------------------------------------------------------------------------------------------------------------------------------------------------------------------------------|
| <b>Demographic and community factors</b>                |                                                                                   |                                                                                                                                                                 |                                                                              |                                                                                                                                                                                                                                                |
| Age group                                               | Employment records                                                                | NA                                                                                                                                                              | NA                                                                           | Categorized into deciles                                                                                                                                                                                                                       |
| Race                                                    | Employment records                                                                | NA                                                                                                                                                              | NA                                                                           | Self-reported                                                                                                                                                                                                                                  |
| Ethnicity                                               | Employment records                                                                | NA                                                                                                                                                              | NA                                                                           | Self-reported                                                                                                                                                                                                                                  |
| Contact with confirmed/suspected positive individual(s) | Survey                                                                            | Since February 1, 2020, have you had close contact (>10 minutes of face to face) with someone with confirmed or suspected COVID-19 outside of work?             | 1. Yes exposed to someone with COVID-19;<br>2. Yes;<br>3. No;<br>4. Not sure | Categorized into yes/no (not sure categorized as "no")                                                                                                                                                                                         |
| Residential COVID-19 incidence                          | Georgia Department of Public Health and employment records (residential zip code) | NA                                                                                                                                                              | NA                                                                           | Cumulative incidence of persons under investigation for COVID-19 linked with zip code data and week of serology test. Cumulative incidence two weeks prior to week of serology test was used to account for lag between infection and testing. |
| <b>Occupational factors</b>                             |                                                                                   |                                                                                                                                                                 |                                                                              |                                                                                                                                                                                                                                                |
| Caring for COVID-19 positive patient(s)                 | Survey                                                                            | While at work, did/do you provide direct patient care for any patient(s) known (confirmed) to be positive for COVID-19, regardless of location in the facility? | Yes;<br>No;<br>Unknown                                                       | Unknown categorized as "no"                                                                                                                                                                                                                    |

**eTable 1. Details of data sources and factor descriptions (continued).**

| Factor                                                                             | Data source | Survey question                                                                                                                                                                               | Possible responses                                                                                                                                                                                                                                                                                                                                                                                                                                                                                                                                                                                                                                           | Additional information                                                                                                                                                                                                                                                                                                                                                                                                                                                                                                                                                                                                                                                                                                                                                                                                                                                                                                                                                                                         |
|------------------------------------------------------------------------------------|-------------|-----------------------------------------------------------------------------------------------------------------------------------------------------------------------------------------------|--------------------------------------------------------------------------------------------------------------------------------------------------------------------------------------------------------------------------------------------------------------------------------------------------------------------------------------------------------------------------------------------------------------------------------------------------------------------------------------------------------------------------------------------------------------------------------------------------------------------------------------------------------------|----------------------------------------------------------------------------------------------------------------------------------------------------------------------------------------------------------------------------------------------------------------------------------------------------------------------------------------------------------------------------------------------------------------------------------------------------------------------------------------------------------------------------------------------------------------------------------------------------------------------------------------------------------------------------------------------------------------------------------------------------------------------------------------------------------------------------------------------------------------------------------------------------------------------------------------------------------------------------------------------------------------|
| Caring patient(s) found to be COVID-19 positive while not on isolation precautions | Survey      | While at work, did you care for patient(s) who, while not on isolation precautions, were tested and found to be COVID-19 positive?                                                            | Yes;<br>No;<br>Not sure                                                                                                                                                                                                                                                                                                                                                                                                                                                                                                                                                                                                                                      | Not sure categorized as "no"                                                                                                                                                                                                                                                                                                                                                                                                                                                                                                                                                                                                                                                                                                                                                                                                                                                                                                                                                                                   |
| Contact with other healthcare worker found to be COVID-19 positive                 | Survey      | While at work, did you have close contact (>10 minutes face to face) to other healthcare worker(s) who were found to have COVID-19 infection during the time period you were exposed to them? | Yes;<br>No;<br>Not sure                                                                                                                                                                                                                                                                                                                                                                                                                                                                                                                                                                                                                                      | Not sure categorized as "no"                                                                                                                                                                                                                                                                                                                                                                                                                                                                                                                                                                                                                                                                                                                                                                                                                                                                                                                                                                                   |
| Workplace location                                                                 | Survey      | Where do/did you spend most time at work in the hospital during the COVID-19 pandemic? (may check more than one if you split your time equally)                                               | <ol style="list-style-type: none"> <li>1. Emergency department;</li> <li>2. Medical-surgical focused on COVID-19 patients;</li> <li>3. Medical-surgical-not focused on COVID-19 patients;</li> <li>4. ICU focused on COVID-19 patients;</li> <li>5. ICU-not focused on COVID-19 patients</li> <li>6. Clinic focused on COVID-19 patients;</li> <li>7. Clinic not focused on COVID-19 patients;</li> <li>8. OR or peri-operative area;</li> <li>9. Other procedure area;</li> <li>10. Other hospital area;</li> <li>11. Non-clinical area of hospital/clinic</li> <li>12. Not in hospital or clinic;</li> <li>13. Work from home: worked from home</li> </ol> | <p>Hierarchy to classify participant into one category (even if multiple job locations were selected) in the order below. Order based on anticipated encounters with COVID-19 positive patients.</p> <ol style="list-style-type: none"> <li>1. Emergency department: emergency department</li> <li>2. COVID-19 focused: medical-surgical focused on COVID-19 patients; ICU focused on COVID-19 patients; clinic focused on COVID-19 patients</li> <li>3. Inpatient not COVID-19 focused: medical-surgical-not focused on COVID-19 patients; ICU-not focused on COVID-19 patients</li> <li>4. Outpatient clinical: clinic not focused on COVID-19 patients</li> <li>5. OR/procedure: OR or peri-operative area; other procedure area</li> <li>6. Other hospital area: other hospital area</li> <li>7. No patient contact: non-clinical area of hospital/clinic; not in hospital or clinic</li> <li>8. Work from home: worked from home</li> <li>9. Not specified: no job location selected in survey</li> </ol> |

**eTable 1. Details of data sources and factor descriptions (continued).**

| Factor         | Data source | Survey question                                                                                                                                                | Possible responses                                                                                                                                                                                                                                                                                                                          | Additional information |
|----------------|-------------|----------------------------------------------------------------------------------------------------------------------------------------------------------------|---------------------------------------------------------------------------------------------------------------------------------------------------------------------------------------------------------------------------------------------------------------------------------------------------------------------------------------------|------------------------|
| Workplace role | Survey      | What is your job role?                                                                                                                                         | <ol style="list-style-type: none"> <li>1. Advanced practice provider</li> <li>2. Environmental services</li> <li>3. Nurse</li> <li>4. Nurse technician</li> <li>5. Other direct care provider</li> <li>6. Other with no patient contact</li> <li>7. Physician</li> <li>8. Radiology technician</li> <li>9. Respiratory therapist</li> </ol> |                        |
| PPE use        | Survey      | While at work, please assess your use of workplace recommended personal protective equipment (PPE) while caring for patients with suspected or known COVID-19. | <ol style="list-style-type: none"> <li>1. Had numerous situations where I was not using recommended PPE;</li> <li>2. Wore PPE but unsure if I was always using properly;</li> <li>3. Always used recommended PPE and paid close attention to donning and doffing</li> </ol>                                                                 |                        |

NA: not applicable; ICU: intensive care unit; OR: operating room; PPE: personal protective equipment

**eTable 2. Additional descriptive statistics for survey participants (n=9,610).**

| <b>Factor</b>                                                                              | <b>Total sample<br/>N. (%)</b> | <b>Seropositive<br/>N. (%)</b> |
|--------------------------------------------------------------------------------------------|--------------------------------|--------------------------------|
| <b>SARS-CoV-2 testing</b>                                                                  |                                |                                |
| Week of serology testing                                                                   |                                |                                |
| 4/19/2020                                                                                  | 852 (8.9)                      | 40 (4.7)                       |
| 4/26/2020                                                                                  | 1060 (11.0)                    | 40 (3.8)                       |
| 5/3/2020                                                                                   | 874 (9.1)                      | 52 (5.9)                       |
| 5/10/2020                                                                                  | 1954 (20.3)                    | 126 (6.4)                      |
| 5/17/2020                                                                                  | 2270 (23.6)                    | 172 (7.6)                      |
| 5/24/2020                                                                                  | 1721 (17.9)                    | 57 (3.3)                       |
| 5/31/2020                                                                                  | 569 (5.9)                      | 52 (9.1)                       |
| 6/7/20 - 6/21/20                                                                           | 310 (3.2)                      | 16 (5.2)                       |
| <b>Prior illness (fever or respiratory symptoms) since February 1, 2020 &amp; symptoms</b> |                                |                                |
| Prior illness, no COVID-19 test                                                            |                                |                                |
| No                                                                                         | 7969 (82.9)                    | 449 (5.6)                      |
| Yes                                                                                        | 1641 (17.1)                    | 106 (6.5)                      |
| Prior illness, negative COVID-19 test                                                      |                                |                                |
| No                                                                                         | 8882 (92.4)                    | 511 (5.8)                      |
| Yes                                                                                        | 728 (7.6)                      | 44 (6.0)                       |
| Previous positive COVID-19 test                                                            |                                |                                |
| No                                                                                         | 9477 (98.6)                    | 431 (4.5)                      |
| Yes                                                                                        | 133 (1.4)                      | 124 (93.2)                     |
| Previous illness (regardless of COVID-19 testing status)                                   |                                |                                |
| No                                                                                         | 7191 (74.8)                    | 298 (4.1)                      |
| Yes                                                                                        | 2419 (25.2)                    | 257 (10.6)                     |
| Any symptoms                                                                               |                                |                                |
| No                                                                                         | 129 (1.3)                      | 12 (9.3)                       |
| Yes                                                                                        | 2290 (23.8)                    | 245 (10.7)                     |
| Not applicable                                                                             | 7191 (74.8)                    | 298 (4.1)                      |
| <b>Additional demographics &amp; detailed job location</b>                                 |                                |                                |
| Sex                                                                                        |                                |                                |
| Female                                                                                     | 7456 (77.6)                    | 428 (5.7)                      |
| Male                                                                                       | 2154 (22.4)                    | 127 (5.9)                      |

**eTable 2. Additional descriptive statistics for survey participants (n=9,610)  
(continued).**

| <b>Factor</b>                                      | <b>Total sample<br/>N. (%)</b> | <b>Seropositive<br/>N. (%)</b> |
|----------------------------------------------------|--------------------------------|--------------------------------|
| Job location (dichotomous)                         |                                |                                |
| Medical-surgical- focused on COVID-19 patients     | 1160 (12.1)                    | 83 (7.2)                       |
| Medical-surgical- not focused on COVID-19 patients | 2024 (21.1)                    | 120 (5.9)                      |
| ICU- focused on COVID-19 patients                  | 1320 (13.7)                    | 87 (6.6)                       |
| ICU- not focused on COVID-19 patients              | 1445 (15.0)                    | 99 (6.9)                       |
| OR or peri-operative area                          | 877 (9.1)                      | 51 (5.8)                       |
| Other procedure area                               | 609 (6.3)                      | 40 (6.6)                       |
| Emergency department                               | 1007 (10.5)                    | 67 (6.7)                       |
| Other hospital area                                | 1716 (17.9)                    | 102 (5.9)                      |
| Clinic- focused on COVID-19 patients               | 267 (2.8)                      | 16 (6.0)                       |
| Clinic- not focused on COVID-19 patients           | 2190 (22.8)                    | 115 (5.3)                      |
| Non-clinical area of hospital or clinic            | 1582 (16.5)                    | 84 (5.3)                       |
| Not in hospital or clinic                          | 239 (2.5)                      | 12 (5.0)                       |
| Work from home                                     | 895 (9.3)                      | 42 (4.7)                       |

ICU: intensive care unit; OR: operating room

**eTable 3. STROBE Statement—checklist of items that should be included in reports of observational studies**

|                              | <b>Item No</b> | <b>Recommendation</b>                                                                                                                                                                                                                                                                                                                                                                                                                                                  | <b>Page No</b>   |
|------------------------------|----------------|------------------------------------------------------------------------------------------------------------------------------------------------------------------------------------------------------------------------------------------------------------------------------------------------------------------------------------------------------------------------------------------------------------------------------------------------------------------------|------------------|
| <b>Title and abstract</b>    | 1              | (a) Indicate the study's design with a commonly used term in the title or the abstract                                                                                                                                                                                                                                                                                                                                                                                 | 1                |
|                              |                | (b) Provide in the abstract an informative and balanced summary of what was done and what was found                                                                                                                                                                                                                                                                                                                                                                    | 1                |
| <b>Introduction</b>          |                |                                                                                                                                                                                                                                                                                                                                                                                                                                                                        |                  |
| Background/<br>rationale     | 2              | Explain the scientific background and rationale for the investigation being reported                                                                                                                                                                                                                                                                                                                                                                                   | 2                |
| Objectives                   | 3              | State specific objectives, including any prespecified hypotheses                                                                                                                                                                                                                                                                                                                                                                                                       | 2                |
| <b>Methods</b>               |                |                                                                                                                                                                                                                                                                                                                                                                                                                                                                        |                  |
| Study design                 | 4              | Present key elements of study design early in the paper                                                                                                                                                                                                                                                                                                                                                                                                                | 2                |
| Setting                      | 5              | Describe the setting, locations, and relevant dates, including periods of recruitment, exposure, follow-up, and data collection                                                                                                                                                                                                                                                                                                                                        | 2                |
| Participants                 | 6              | (a) <i>Cohort study</i> —Give the eligibility criteria, and the sources and methods of selection of participants. Describe methods of follow-up<br><i>Case-control study</i> —Give the eligibility criteria, and the sources and methods of case ascertainment and control selection. Give the rationale for the choice of cases and controls<br><i>Cross-sectional study</i> —Give the eligibility criteria, and the sources and methods of selection of participants | 2                |
|                              |                | (b) <i>Cohort study</i> —For matched studies, give matching criteria and number of exposed and unexposed<br><i>Case-control study</i> —For matched studies, give matching criteria and the number of controls per case                                                                                                                                                                                                                                                 | n/a              |
| Variables                    | 7              | Clearly define all outcomes, exposures, predictors, potential confounders, and effect modifiers. Give diagnostic criteria, if applicable                                                                                                                                                                                                                                                                                                                               | 2-3              |
| Data sources/<br>measurement | 8*             | For each variable of interest, give sources of data and details of methods of assessment (measurement). Describe comparability of assessment methods if there is more than one group                                                                                                                                                                                                                                                                                   | 2-3,<br>eTable 1 |
| Bias                         | 9              | Describe any efforts to address potential sources of bias                                                                                                                                                                                                                                                                                                                                                                                                              | 3                |
| Study size                   | 10             | Explain how the study size was arrived at                                                                                                                                                                                                                                                                                                                                                                                                                              | 2                |
| Quantitative<br>variables    | 11             | Explain how quantitative variables were handled in the analyses. If applicable, describe which groupings were chosen and why                                                                                                                                                                                                                                                                                                                                           | 2-3,<br>eTable 1 |
| Statistical<br>methods       | 12             | (a) Describe all statistical methods, including those used to control for confounding                                                                                                                                                                                                                                                                                                                                                                                  | 2-3              |
|                              |                | (b) Describe any methods used to examine subgroups and interactions                                                                                                                                                                                                                                                                                                                                                                                                    | n/a              |
|                              |                | (c) Explain how missing data were addressed                                                                                                                                                                                                                                                                                                                                                                                                                            | 3                |
|                              |                | (d) <i>Cohort study</i> —If applicable, explain how loss to follow-up was addressed<br><i>Case-control study</i> —If applicable, explain how matching of cases and controls was addressed<br><i>Cross-sectional study</i> —If applicable, describe analytical methods taking account of sampling strategy                                                                                                                                                              | n/a              |
|                              |                | (e) Describe any sensitivity analyses                                                                                                                                                                                                                                                                                                                                                                                                                                  | 2-3              |



**eTable 3. STROBE Statement—checklist of items that should be included in reports of observational studies (continued)**

| <b>Results</b>           |     |                                                                                                                                                                                                              |                      |
|--------------------------|-----|--------------------------------------------------------------------------------------------------------------------------------------------------------------------------------------------------------------|----------------------|
| Participants             | 13* | (a) Report numbers of individuals at each stage of study—eg numbers potentially eligible, examined for eligibility, confirmed eligible, included in the study, completing follow-up, and analysed            | 3                    |
|                          |     | (b) Give reasons for non-participation at each stage                                                                                                                                                         | 3                    |
|                          |     | (c) Consider use of a flow diagram                                                                                                                                                                           | n/a                  |
| Descriptive data         | 14* | (a) Give characteristics of study participants (eg demographic, clinical, social) and information on exposures and potential confounders                                                                     | 3, Table 1, eTable 2 |
|                          |     | (b) Indicate number of participants with missing data for each variable of interest                                                                                                                          | Table 1              |
|                          |     | (c) <i>Cohort study</i> —Summarise follow-up time (eg, average and total amount)                                                                                                                             | n/a                  |
| Outcome data             | 15* | <i>Cohort study</i> —Report numbers of outcome events or summary measures over time                                                                                                                          | n/a                  |
|                          |     | <i>Case-control study</i> —Report numbers in each exposure category, or summary measures of exposure                                                                                                         | n/a                  |
|                          |     | <i>Cross-sectional study</i> —Report numbers of outcome events or summary measures                                                                                                                           | 3, Table 1           |
| Main results             | 16  | (a) Give unadjusted estimates and, if applicable, confounder-adjusted estimates and their precision (eg, 95% confidence interval). Make clear which confounders were adjusted for and why they were included | 3-4, Table 1         |
|                          |     | (b) Report category boundaries when continuous variables were categorized                                                                                                                                    | n/a                  |
|                          |     | (c) If relevant, consider translating estimates of relative risk into absolute risk for a meaningful time period                                                                                             | n/a                  |
| Other analyses           | 17  | Report other analyses done—eg analyses of subgroups and interactions, and sensitivity analyses                                                                                                               | 3-4                  |
| <b>Discussion</b>        |     |                                                                                                                                                                                                              |                      |
| Key results              | 18  | Summarise key results with reference to study objectives                                                                                                                                                     | 4-5                  |
| Limitations              | 19  | Discuss limitations of the study, taking into account sources of potential bias or imprecision. Discuss both direction and magnitude of any potential bias                                                   | 5                    |
| Interpretation           | 20  | Give a cautious overall interpretation of results considering objectives, limitations, multiplicity of analyses, results from similar studies, and other relevant evidence                                   | 4-5                  |
| Generalisability         | 21  | Discuss the generalisability (external validity) of the study results                                                                                                                                        | 4-5                  |
| <b>Other information</b> |     |                                                                                                                                                                                                              |                      |
| Funding                  | 22  | Give the source of funding and the role of the funders for the present study and, if applicable, for the original study on which the present article is based                                                | 5                    |

\*Give information separately for cases and controls in case-control studies and, if applicable, for exposed and unexposed groups in cohort and cross-sectional studies.
